# Supplementary material for: Functionalized heteropolyanions: high-valent metal nitrido fragments incorporated into a Keggin polyoxometalate structureElectronic supplementary information (ESI) available: general synthetic and characterization details. See http://www.rsc.org/suppdata/cc/b2/b209173a/
Source: Royal Society of Chemistry journal article supplement (doi:10.1039/b209173a), 2002-11-07
Supplement: b209173a.doc [file b209173a.doc]

Supplementary Information for "Functionalized heteropolyanions . . ."

[Bu4N][Os15NCl4] was prepared from K[OsO315N] using the method described for the unlabelled analogue by Gray *et al.*1 K[OsO315N] was prepared from OsO4 and [15NH4]Cl as described for the unlabelled analogue by Clifford and Kobayashi.2 Anhydrous CH3CN was purchased from Aldrich and used as received.

Cyclic voltammetry studies on **2** (CH3CN; 10–3 mol L–1) were conducted with a PAR 273 potentiostat with a carbon working electrode, Pt counter electrode, and a saturated calomel electrode as the reference. [Bu4N][BF4] (10–1 mol L–1) was used as the supporting electrolyte.

15N, 31P, and 183W NMR spectra were recorded on Bruker AM500 and AC300 spectrometers. 183W chemical shifts are reported with respect to 2M aqueous alkaline Na2WO4, 15N chemical shifts are reported with respect to neat liquid CH3NO2, and 31P chemical shifts are reported with respect to 85 % H3PO4.

1. C. D. Cowman, W. C. Trogler, K. R. Mann, C. K. Poon, H. B. Gray, *Inorg. Chem.*, **1976**, *15*, 1747.

1. A. F. Clifford, C. S. Kobayashi, *Inorg. Synth.*, **1960**, *6*, 204.
